# Supplementary material for: Superior lead-free high-temperature piezoceramics of BiFeO3–BaTiO3–(Bi0.5Na0.5)TiO3 through cooperative regulation
Source: Royal Society of Chemistry journal article supplement (doi:10.1039/d3ta00158j), 2023-01-01
Supplement: d3ta00158j1.pdf [file d3ta00158j1.pdf]

**Supplementary material for**  
**Superior lead-free high-temperature piezoceramics of BiFeO<sub>3</sub>-BaTiO<sub>3</sub>-  
(Bi<sub>0.5</sub>Na<sub>0.5</sub>)TiO<sub>3</sub> through cooperative regulation**

Aiwen Xie<sup>1, ‡</sup>, Mengshan Wang<sup>2, ‡</sup>, Jian Fu<sup>2</sup>, Zide Yu<sup>2</sup>, Xinchun Xie<sup>1</sup>, Ruzhong Zuo<sup>1,\*</sup>

<sup>1</sup>Center for Advanced Ceramics, School of Materials Science and Engineering, Anhui  
Polytechnic University, Wuhu, 241000, P.R. China

<sup>2</sup>Institute of Electro Ceramics & Devices, School of Materials Science and Engineering, Hefei  
University of Technology, Hefei, 230009, P.R. China

‡these authors contributed equally.

\*the corresponding author: [zuoruzhong@ahpu.edu.cn](mailto:zuoruzhong@ahpu.edu.cn) (R. Zuo)

**Table S1.** Rietveld refined structural parameters of the BF(MN)<sub>x</sub>-BT-BNT ceramics.

| <i>x</i> | Phase | Fraction (%) | Lattice parameters                                                      | <i>R</i> <sub>wp</sub> (%) | <i>R</i> <sub>p</sub> (%) | $\chi^2$ |
|----------|-------|--------------|-------------------------------------------------------------------------|----------------------------|---------------------------|----------|
| 0.       | R     | 59           | a=b=5.6514 Å, c=13.8960 Å, $\alpha=\beta=90^\circ$ , $\gamma=120^\circ$ | 9.82                       | 2.73                      | 1.86     |
|          | Pc    | 41           | a=b=c=4.0008 Å, $\alpha=\beta=\gamma=90^\circ$                          |                            |                           |          |
| 0.001    | R     | 62           | a=b=5.6507 Å, c=13.9077 Å, $\alpha=\beta=90^\circ$ , $\gamma=120^\circ$ | 10.17                      | 2.94                      | 1.89     |
|          | Pc    | 38           | a=b=c=3.9951 Å, $\alpha=\beta=\gamma=90^\circ$                          |                            |                           |          |
| 0.002    | R     | 53           | a=b=5.6516 Å, c=13.9057 Å, $\alpha=\beta=90^\circ$ , $\gamma=120^\circ$ | 9.94                       | 2.87                      | 1.78     |
|          | Pc    | 47           | a=b=c=3.9957 Å, $\alpha=\beta=\gamma=90^\circ$                          |                            |                           |          |
| 0.003    | R     | 49           | a=b=5.6525 Å, c=13.9049 Å, $\alpha=\beta=90^\circ$ , $\gamma=120^\circ$ | 9.68                       | 2.65                      | 1.71     |
|          | Pc    | 51           | a=b=c=3.9973 Å, $\alpha=\beta=\gamma=90^\circ$                          |                            |                           |          |
| 0.004    | R     | 45           | a=b=5.6488 Å, c=13.9105 Å, $\alpha=\beta=90^\circ$ , $\gamma=120^\circ$ | 9.92                       | 2.97                      | 1.68     |
|          | Pc    | 55           | a=b=c=3.9995 Å, $\alpha=\beta=\gamma=90^\circ$                          |                            |                           |          |
| 0.005    | R     | 37           | a=b=5.6485 Å, c=13.9152 Å, $\alpha=\beta=90^\circ$ , $\gamma=120^\circ$ | 10.12                      | 3.02                      | 1.89     |
|          | Pc    | 63           | a=b=c=4.0015 Å, $\alpha=\beta=\gamma=90^\circ$                          |                            |                           |          |

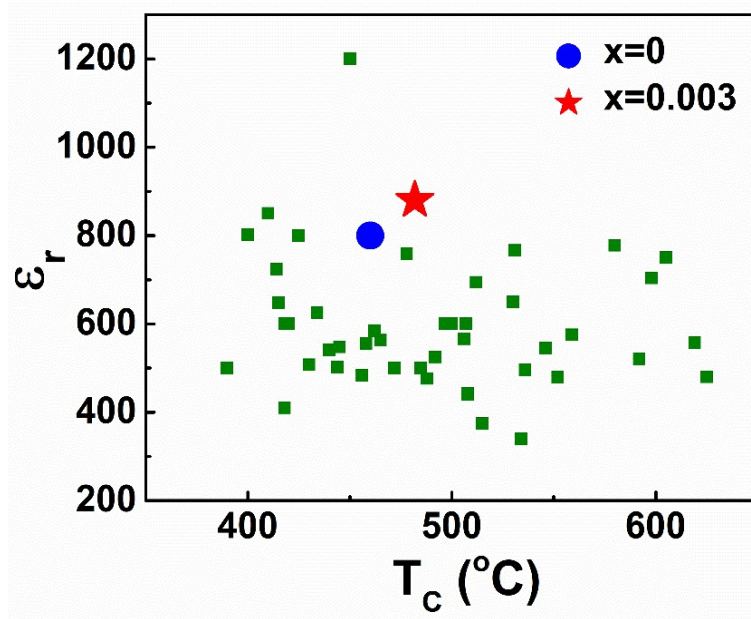

**Fig. S1.** The comparison of room temperature  $\epsilon_r$  and  $T_c$  values for various BF-BT-based ceramics [Ref. 20-33 in the main text].

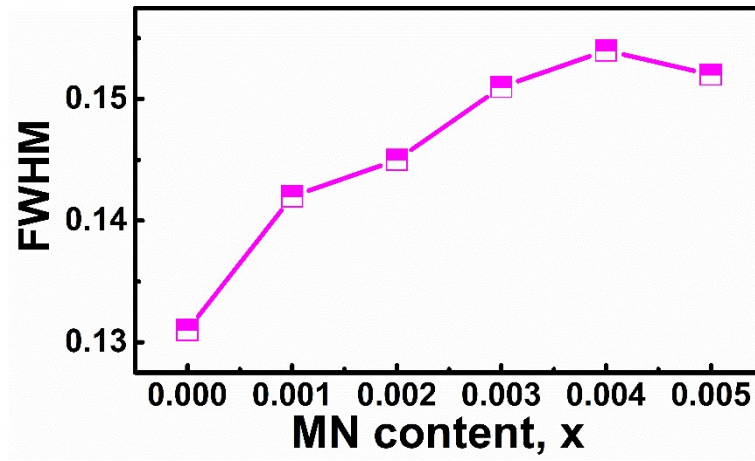

Fig. S2. The variation of FWHM for the BF(MN)<sub>x</sub>-BT-BNT ceramics.

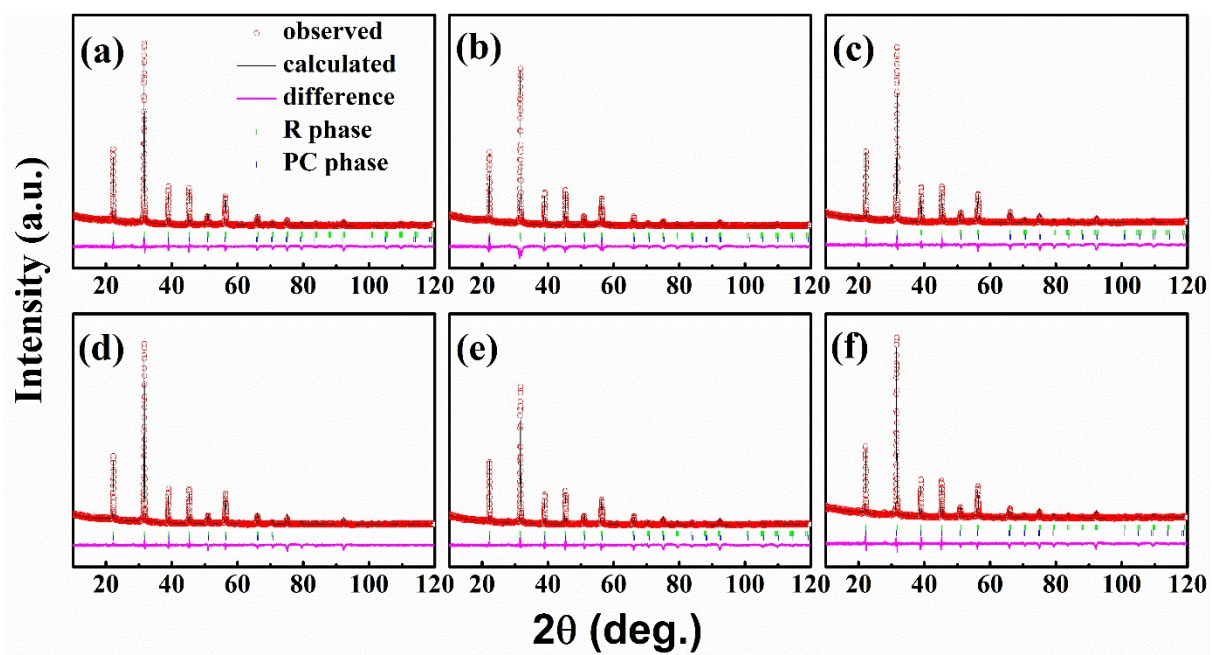

**Fig. S3.** (a-f) Rietveld refinement of BF(MN)<sub>x</sub>-BT-BNT ceramic powders: (a)  $x = 0$ , (b)  $x = 0.001$ , (c)  $x = 0.002$ , (d)  $x = 0.003$ , (e)  $x = 0.004$ , and (f)  $x = 0.005$ .

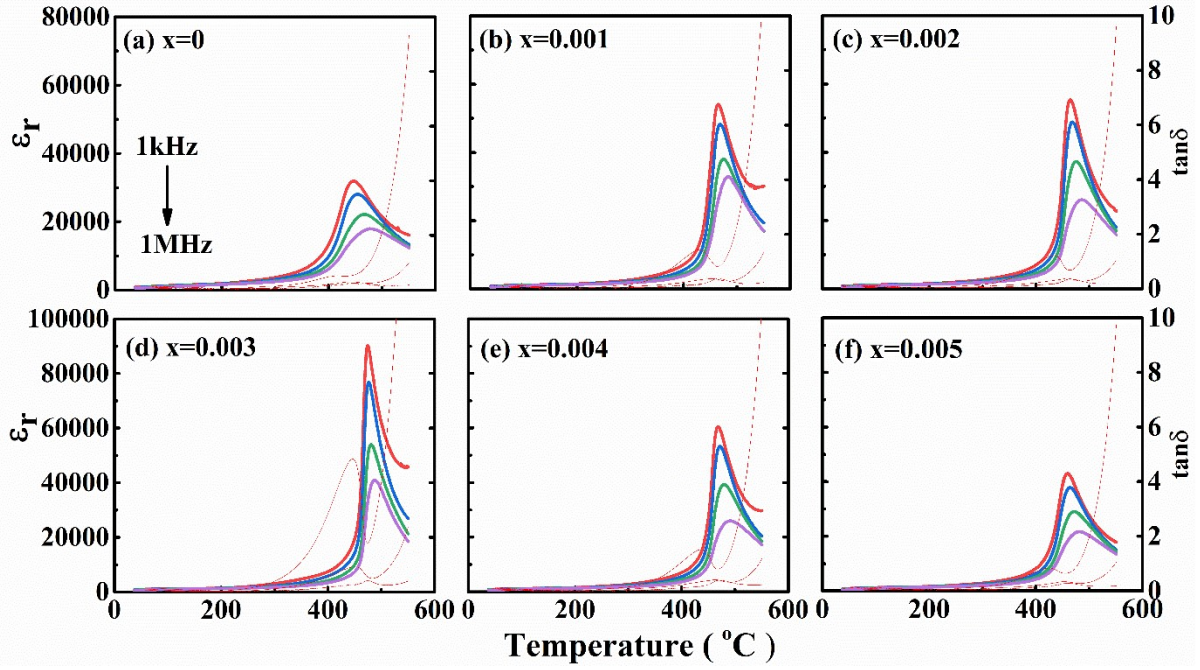

**Fig. S4.** Temperature-dependent  $\epsilon_r$ - $T$  and  $\tan\delta$ - $T$  curves at different frequency for  $\text{BF}(\text{MN})_x$ -BT-BNT ceramics.

The dielectric relaxation characteristics of the relaxor FE ceramics can generally be described by two parameters  $\gamma$  and  $\Delta T_{relax}$ , in which  $\gamma$  can be calculated by a modified Curie-Weiss law  $1/\epsilon_r - 1/\epsilon_m = (T - T_m)\gamma/C$  ( $T > T_m$ ), and  $\Delta T_{relax}$  can be defined as the difference between two  $T_m$  values measured at 1 MHz and 1 kHz, respectively. The calculated  $\gamma$  and  $\Delta T_{relax}$  values according to Fig. S4 are shown in Fig. S5.

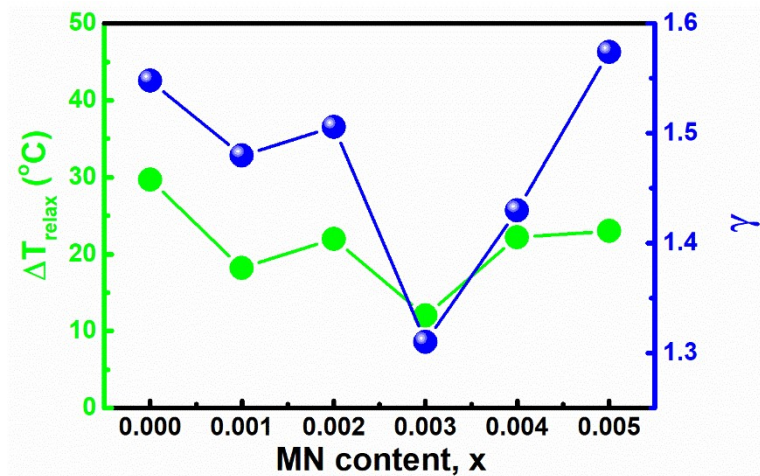

**Fig. S5.** The variation of  $\gamma$  and  $\Delta T_{relax}$  as a function of  $x$ .
